# Supplementary material for: Association of hoarding case identification and animal protection programs to socioeconomic indicators in a major metropolitan area of Brazil
Source: Frontiers journal article supplement (doi:10.3389/fvets.2022.872777), 2022-10-03
Supplement: Data_Sheet_2.PDF [file Data_Sheet_2.PDF]

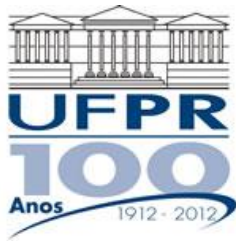

**Questionnaire of individuals with animal and/or object hoarding disorder in Curitiba metropolitan area, Brazil.**

City: \_\_\_\_\_

Name: \_\_\_\_\_

Position: \_\_\_\_\_ E-mail: \_\_\_\_\_

1) Is there animal protection programs or other related programs destined to individual with animal/object hoarding behavior?

( ) Yes.

( ) No.

2) If yes, which one?

( ) Animal identification (animal microchip)

( ) Neutering program (population management)

( ) Responsible ownership program

( ) Animal welfare control

( ) Other animal programs: \_\_\_\_\_

( ) None.

3) Contact of individuals with animal hoarding behavior:

( ) Yes.

( ) No.

( ) No information.

4) If yes, how many individuals with animal hoarding behavior are there in the city-mapping of individuals with animal hoarding behavior?

\_\_\_\_\_

5) Contact of individuals with object hoarding behavior:

( ) Yes.

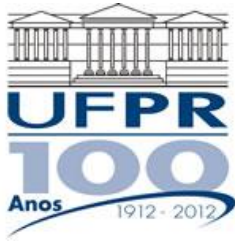

( ) No.

( ) No information.

6) If yes, how many individuals with object hoarding behavior are there in the city-mapping of individuals with object hoarding behavior

---
